# Supplementary material for: Seroprevalence of IgG and Subclasses against the Nucleocapsid of SARS-CoV-2 in Health Workers
Source: MDPI journal article supplement (doi:10.3390/v15040955), 2023-04-13
Supplement: s1 [file s1]

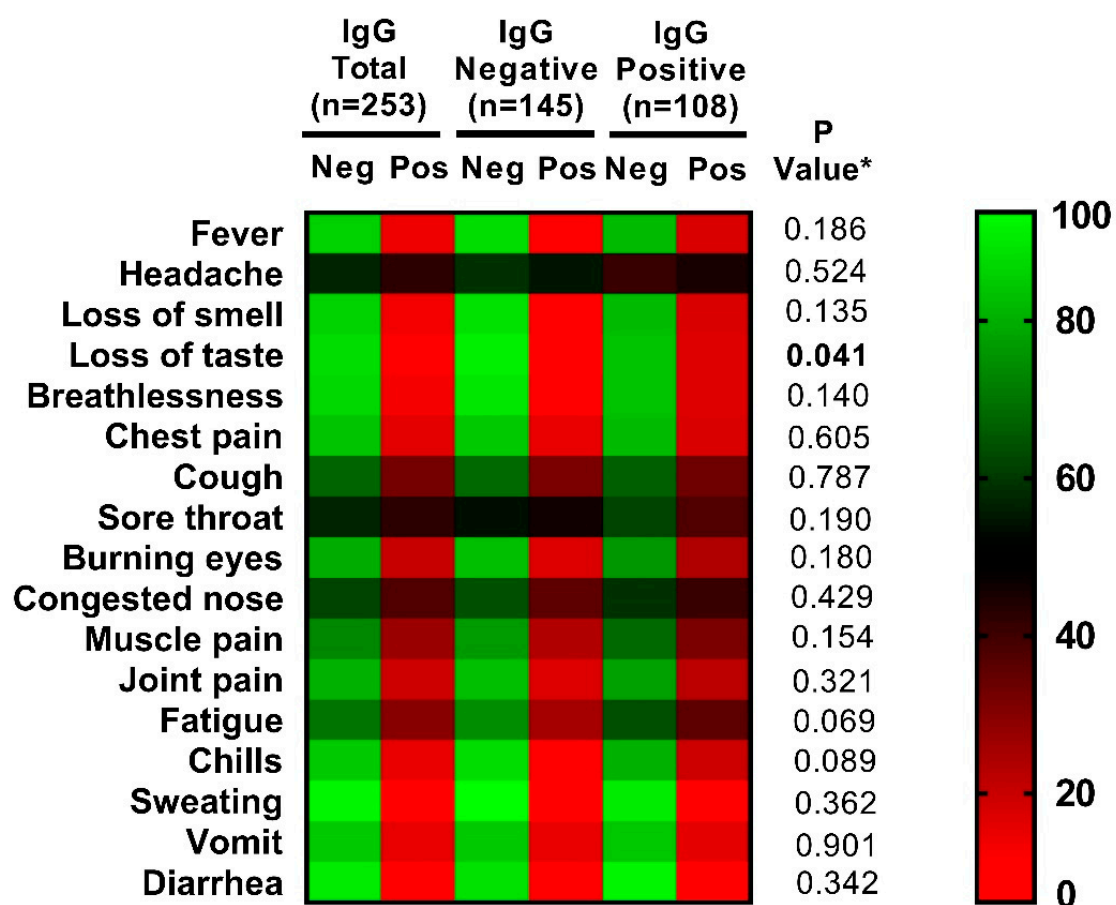

Figure S2.- Symptomatology and its association with the presence of IgG anti-N antibodies. Heat map illustrating the association of the most common symptoms of COVID-19 and the presence of IgG antibodies. P value was calculated by using chi square test.
