# Supplementary material for: Seroprevalence of IgG and Subclasses against the Nucleocapsid of SARS-CoV-2 in Health Workers
Source: MDPI journal article supplement (doi:10.3390/v15040955), 2023-04-13
Supplement: s1 [file s1]

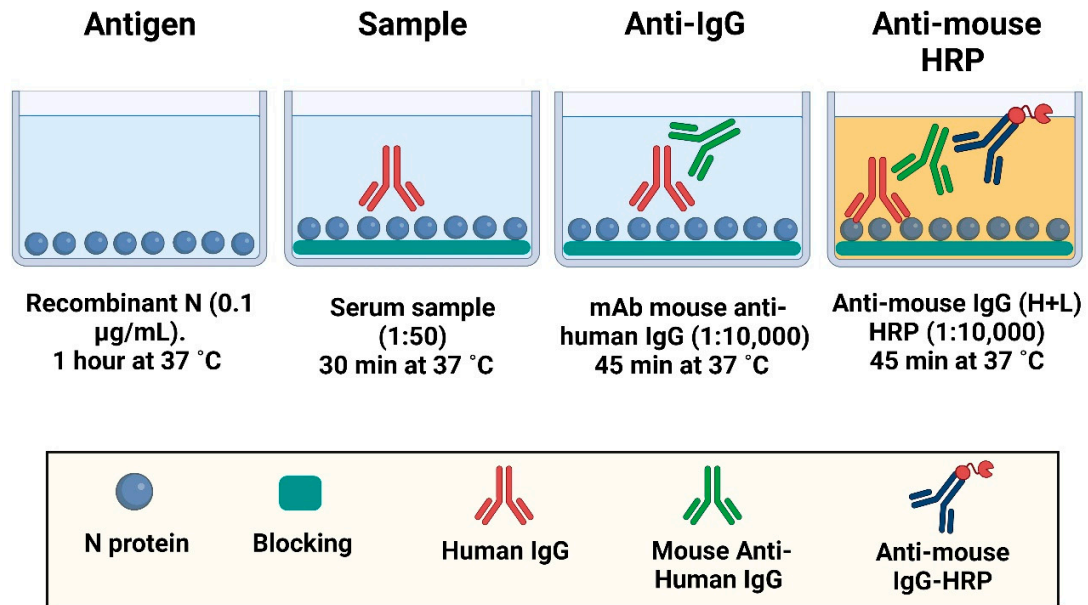

**Figure S1.- Schematic representation of the indirect ELISA protocol used in this study.** In this method, we used as antigen the recombinant N protein of SARS-CoV-2 to a final concentration of 0.1  $\mu\text{g/mL}$  for 1 hour. The plates were blocked with 5% skim milk diluted in PBS-Tween 20 for 30 min. The sample was diluted 1:50 for total IgG and 1:25 for subclass detection in PBS and incubated for 30 min. Later, an anti-human IgG (or subclass) monoclonal antibody was added for 45 min. Finally, an anti-mouse IgG (H+L) coupled to HRP was incubated for 45 min.
