# Supplementary material for: Seroprevalence of IgG and Subclasses against the Nucleocapsid of SARS-CoV-2 in Health Workers
Source: MDPI journal article supplement (doi:10.3390/v15040955), 2023-04-13
Supplement: s1 [file s1]

**Table S1.- Association of subclasses with symptomatology and comorbidities.**

| Characteristic                                                                                                          |          | IgG1 n (%)    |               | p value            | OR   | IC (95%)    |
|-------------------------------------------------------------------------------------------------------------------------|----------|---------------|---------------|--------------------|------|-------------|
|                                                                                                                         |          | Negative      | Positive      |                    |      |             |
| Age*                                                                                                                    |          | 38<br>(30-45) | 38<br>(32-44) | 0.821 <sup>e</sup> | -    | -           |
| COVID-19                                                                                                                | Negative | 18<br>(94.74) | 61<br>(68.54) | 0.021 <sup>+</sup> | 8.26 | 1.17-356.27 |
|                                                                                                                         | Positive | 1<br>(5.26)   | 28<br>(31.46) |                    |      |             |
| Fever                                                                                                                   | Negative | 17<br>(89.47) | 72<br>(80.90) | 0.516 <sup>+</sup> | 2.00 | 0.41-19.46  |
|                                                                                                                         | Positive | 2<br>(10.53)  | 17<br>(19.10) |                    |      |             |
| Headache                                                                                                                | Negative | 11<br>(57.89) | 51<br>(57.30) | 0.962 <sup>*</sup> | 1.02 | 0.34-3.24   |
|                                                                                                                         | Positive | 8<br>(42.11)  | 38<br>(42.70) |                    |      |             |
| Sore throat                                                                                                             | Negative | 11<br>(57.89) | 56<br>(62.92) | 0.682 <sup>*</sup> | 0.81 | 0.27-2.58   |
|                                                                                                                         | Positive | 8<br>(42.11)  | 33<br>(37.08) |                    |      |             |
| Muscle ache                                                                                                             | Negative | 14<br>(73.68) | 60<br>(67.42) | 0.593 <sup>*</sup> | 1.35 | 0.41-5.26   |
|                                                                                                                         | Positive | 5<br>(26.32)  | 29<br>(32.58) |                    |      |             |
| Chills                                                                                                                  | Negative | 16<br>(84.21) | 71<br>(79.78) | 1.000 <sup>+</sup> | 1.35 | 0.33-7.99   |
|                                                                                                                         | Positive | 3<br>(15.79)  | 18<br>(20.22) |                    |      |             |
| Sweating                                                                                                                | Negative | 18<br>(94.74) | 80<br>(89.89) | 1.000 <sup>+</sup> | 2.03 | 0.25-93.66  |
|                                                                                                                         | Positive | 1<br>(5.26)   | 9<br>(10.11)  |                    |      |             |
| Comorbidity                                                                                                             |          |               |               |                    |      |             |
| Obesity                                                                                                                 | Negative | 9<br>(47.37)  | 61<br>(68.54) | 0.079 <sup>*</sup> | 0.41 | 0.13-1.28   |
|                                                                                                                         | Positive | 10<br>(52.63) | 28<br>(31.46) |                    |      |             |
| Asthma                                                                                                                  | Negative | 17<br>(89.47) | 84<br>(94.38) | 0.430 <sup>+</sup> | 0.51 | 0.08-5.77   |
|                                                                                                                         | Positive | 2<br>(10.53)  | 5<br>(5.62)   |                    |      |             |
| Neurological diseases                                                                                                   | Negative | 19<br>(100)   | 88<br>(98.88) | 1.000 <sup>+</sup> | -    | -           |
|                                                                                                                         | Positive | 0<br>(0.00)   | 1<br>(0.93)   |                    |      |             |
| Liver diseases                                                                                                          | Negative | 19<br>(100)   | 87<br>(97.75) | 1.000 <sup>+</sup> | -    | -           |
|                                                                                                                         | Positive | 0<br>(0.00)   | 2<br>(2.25)   |                    |      |             |
| Hypertension                                                                                                            | Negative | 16<br>(84.21) | 85<br>(95.51) | 0.102 <sup>+</sup> | 0.25 | 0.04-1.93   |
|                                                                                                                         | Positive | 3<br>(15.79)  | 4<br>(4.49)   |                    |      |             |
| Symbology: *Median (p25-p75), <sup>e</sup> Mann-Whitney U, <sup>+</sup> Fisher's exact, <sup>*</sup> Chi <sup>2</sup> . |          |               |               |                    |      |             |

Symbology: <sup>x</sup>Median (p25-p75), <sup>a</sup>Mann-Whitney U, <sup>+</sup>Fisher's exact, <sup>\*</sup>Chi<sup>2</sup>.

| Characteristic                                                                                              |          | IgG2 n (%)    |                 | p value             | OR   | IC (95%)    |
|-------------------------------------------------------------------------------------------------------------|----------|---------------|-----------------|---------------------|------|-------------|
|                                                                                                             |          | Negative      | Positive        |                     |      |             |
| Age*                                                                                                        |          | 38<br>(32-45) | 37.5<br>(32-44) | 0.7818 <sup>o</sup> | -    | -           |
| COVID-19                                                                                                    | Negative | 18<br>(69.23) | 61<br>(74.39)   | 0.605*              | 0.77 | 0.27-2.38   |
|                                                                                                             | Positive | 8<br>(30.77)  | 21<br>(25.61)   |                     |      |             |
| Fever                                                                                                       | Negative | 17<br>(65.38) | 72<br>(87.80)   | 0.009*              | 0.56 | 0.16-1.78   |
|                                                                                                             | Positive | 9<br>(34.62)  | 10<br>(12.20)   |                     |      |             |
| Headache                                                                                                    | Negative | 15<br>(57.69) | 47<br>(57.32)   | 0.973*              | 1.02 | 0.38-2.76   |
|                                                                                                             | Positive | 11<br>(42.31) | 35<br>(42.68)   |                     |      |             |
| Sore throat                                                                                                 | Negative | 12<br>(46.15) | 55<br>(67.07)   | 0.055*              | 0.42 | 0.15-1.14   |
|                                                                                                             | Positive | 14<br>(53.85) | 27<br>(32.93)   |                     |      |             |
| Muscle ache                                                                                                 | Negative | 14<br>(53.85) | 60<br>(73.17)   | 0.065*              | 0.43 | 0.16-1.19   |
|                                                                                                             | Positive | 12<br>(46.15) | 22<br>(26.83)   |                     |      |             |
| Chills                                                                                                      | Negative | 17<br>(65.38) | 70<br>(85.37)   | 0.025*              | 0.32 | 0.11-1.03   |
|                                                                                                             | Positive | 9<br>(34.62)  | 12<br>(14.63)   |                     |      |             |
| Sweating                                                                                                    | Negative | 23<br>(88.46) | 75<br>(91.46)   | 0.701 <sup>+</sup>  | 0.72 | 0.15-4.65   |
|                                                                                                             | Positive | 3<br>(11.54)  | 7<br>(8.54)     |                     |      |             |
| Comorbidity                                                                                                 |          |               |                 |                     |      |             |
| Obesity                                                                                                     | Negative | 17<br>(65.38) | 53<br>(64.63)   | 0.994*              | 1.03 | 0.38-2.98   |
|                                                                                                             | Positive | 9<br>(34.62)  | 29<br>(35.37)   |                     |      |             |
| Asthma                                                                                                      | Negative | 24<br>(92.31) | 77<br>(93.90)   | 0.774 <sup>+</sup>  | 0.78 | 0.12-8.70   |
|                                                                                                             | Positive | 2<br>(7.69)   | 5<br>(6.48)     |                     |      |             |
| Neurological diseases                                                                                       | Negative | 25<br>(96.15) | 82<br>(100)     | 0.241 <sup>+</sup>  | -    | -           |
|                                                                                                             | Positive | 1<br>(3.85)   | 0<br>(0.00)     |                     |      |             |
| Liver diseases                                                                                              | Negative | 25<br>(96.15) | 81<br>(98.78)   | 0.425 <sup>+</sup>  | 0.31 | 0.004-25.19 |
|                                                                                                             | Positive | 1<br>(3.85)   | 1<br>(1.22)     |                     |      |             |
| Hypertension                                                                                                | Negative | 24<br>(92.31) | 77<br>(93.90)   | 0.673 <sup>+</sup>  | 0.79 | 0.12-8.81   |
|                                                                                                             | Positive | 2<br>(7.69)   | 5<br>(6.10)     |                     |      |             |
| Symbology: *Median (p25–p75), <sup>o</sup> Mann-Whitney U, <sup>+</sup> Fisher’s exact, *Chi <sup>2</sup> . |          |               |                 |                     |      |             |

| Characteristic                                                                                              |          | IgG3 n (%)    |               | p value             | OR   | IC (95%)    |
|-------------------------------------------------------------------------------------------------------------|----------|---------------|---------------|---------------------|------|-------------|
|                                                                                                             |          | Negative      | Positive      |                     |      |             |
| Age*                                                                                                        |          | 37<br>(32-45) | 39<br>(32-45) | 0.6678 <sup>o</sup> | -    | -           |
| COVID-19                                                                                                    | Negative | 46<br>(74.19) | 33<br>(71.74) | 0.776*              | 1.13 | 0.44-2.90   |
|                                                                                                             | Positive | 16<br>(25.81) | 13<br>(28.26) |                     |      |             |
| Fever                                                                                                       | Negative | 49<br>(79.03) | 40<br>(86.96) | 0.285*              | 0.56 | 0.16-1.78   |
|                                                                                                             | Positive | 13<br>(20.97) | 6<br>(13.04)  |                     |      |             |
| Headache                                                                                                    | Negative | 30<br>(48.39) | 32<br>(69.57) | 0.028*              | 0.41 | 0.17-0.98   |
|                                                                                                             | Positive | 32<br>(51.61) | 14<br>(30.43) |                     |      |             |
| Sore throat                                                                                                 | Negative | 38<br>(61.29) | 29<br>(63.04) | 0.853*              | 0.93 | 0.39-2.18   |
|                                                                                                             | Positive | 24<br>(38.71) | 17<br>(36.96) |                     |      |             |
| Muscle ache                                                                                                 | Negative | 39<br>(62.90) | 35<br>(76.09) | 0.145*              | 0.53 | 0.20-1.34   |
|                                                                                                             | Positive | 23<br>(37.10) | 11<br>(23.91) |                     |      |             |
| Chills                                                                                                      | Negative | 46<br>(74.19) | 41<br>(89.13) | 0.052*              | 0.35 | 0.09-1.13   |
|                                                                                                             | Positive | 16<br>(25.81) | 5<br>(10.87)  |                     |      |             |
| Sweating                                                                                                    | Negative | 55<br>(88.71) | 43<br>(93.48) | 0.512 <sup>+</sup>  | 0.55 | 0.09-2.59   |
|                                                                                                             | Positive | 7<br>(11.29)  | 3<br>(6.52)   |                     |      |             |
| Comorbidity                                                                                                 |          |               |               |                     |      |             |
| Obesity                                                                                                     | Negative | 39<br>(62.90) | 31<br>(67.39) | 0.629*              | 0.82 | 0.34-1.97   |
|                                                                                                             | Positive | 23<br>(37.10) | 15<br>(32.61) |                     |      |             |
| Asthma                                                                                                      | Negative | 57<br>(91.94) | 44<br>(95.65) | 0.438 <sup>+</sup>  | 0.51 | 0.05-3.37   |
|                                                                                                             | Positive | 5<br>(8.06)   | 2<br>(4.35)   |                     |      |             |
| Neurological diseases                                                                                       | Negative | 61<br>(98.39) | 46<br>(100)   | 1.000 <sup>+</sup>  | -    | -           |
|                                                                                                             | Positive | 1<br>(1.61)   | 0<br>(0.00)   |                     |      |             |
| Liver diseases                                                                                              | Negative | 61<br>(98.39) | 45<br>(98.15) | 1.000 <sup>+</sup>  | 1.36 | 0.02-108.12 |
|                                                                                                             | Positive | 1<br>(1.61)   | 1<br>(2.17)   |                     |      |             |
| Hypertension                                                                                                | Negative | 57<br>(91.94) | 44<br>(95.64) | 0.696 <sup>+</sup>  | 0.55 | 0.05-3.45   |
|                                                                                                             | Positive | 5<br>(8.06)   | 2<br>(4.35)   |                     |      |             |
| Symbology: *Median (p25–p75), <sup>o</sup> Mann-Whitney U, <sup>+</sup> Fisher’s exact, *Chi <sup>2</sup> . |          |               |               |                     |      |             |

| Characteristic                                                                                          |          | IgG4 n (%)    |               | p value             | OR   | IC (95%)    |
|---------------------------------------------------------------------------------------------------------|----------|---------------|---------------|---------------------|------|-------------|
|                                                                                                         |          | Negative      | Positive      |                     |      |             |
| Age*                                                                                                    |          | 38<br>(32-45) | 37<br>(31-44) | 0.4566 <sup>o</sup> | -    | -           |
| COVID-19                                                                                                | Negative | 33<br>(70.21) | 46<br>(75.41) | 0.051*              | 0.77 | 0.300-1.98  |
|                                                                                                         | Positive | 14<br>(29.79) | 15<br>(24.59) |                     |      |             |
| Fever                                                                                                   | Negative | 34<br>(72.34) | 55<br>(90.16) | 0.016*              | 0.28 | 0.08-0.991  |
|                                                                                                         | Positive | 13<br>(27.66) | 6<br>(9.84)   |                     |      |             |
| Headache                                                                                                | Negative | 22<br>(46.81) | 40<br>(65.57) | 0.051*              | 0.46 | 0.20-1.08   |
|                                                                                                         | Positive | 25<br>(53.19) | 21<br>(34.43) |                     |      |             |
| Sore throat                                                                                             | Negative | 24<br>(51.06) | 43<br>(70.49) | 0.039*              | 0.43 | 0.18-1.04   |
|                                                                                                         | Positive | 23<br>(48.94) | 18<br>(29.51) |                     |      |             |
| Muscle ache                                                                                             | Negative | 26<br>(55.32) | 48<br>(78.69) | 0.010*              | 0.33 | 0.13-0.84   |
|                                                                                                         | Positive | 21<br>(44.68) | 13<br>(21.31) |                     |      |             |
| Chills                                                                                                  | Negative | 32<br>(68.09) | 55<br>(90.16) | 0.004*              | 0.23 | 0.07-0.72   |
|                                                                                                         | Positive | 15<br>(31.91) | 6<br>(9.84)   |                     |      |             |
| Sweating                                                                                                | Negative | 38<br>(80.85) | 60<br>(98.36) | 0.002+              | 0.70 | 0.002-0.55  |
|                                                                                                         | Positive | 9<br>(19.15)  | 1<br>(1.64)   |                     |      |             |
| Comorbidity                                                                                             |          |               |               |                     |      |             |
| Obesity                                                                                                 | Negative | 29<br>(61.70) | 41<br>(67.21) | 0.552*              | 0.79 | 0.33-1.88   |
|                                                                                                         | Positive | 18<br>(38.30) | 20<br>(32.79) |                     |      |             |
| Asthma                                                                                                  | Negative | 46<br>(97.87) | 55<br>(90.16) | 0.107+              | 5.02 | 0.57-235.70 |
|                                                                                                         | Positive | 1<br>(2.13)   | 6<br>(9.84)   |                     |      |             |
| Neurological diseases                                                                                   | Negative | 46<br>(97.87) | 61<br>(100)   | 0.435+              | -    | -           |
|                                                                                                         | Positive | 1<br>(2.13)   | 0<br>(0.00)   |                     |      |             |
| Liver diseases                                                                                          | Negative | 46<br>(97.87) | 60<br>(98.36) | 1.000+              | 0.76 | 0.01-61.47  |
|                                                                                                         | Positive | 1<br>(2.13)   | 1<br>(1.64)   |                     |      |             |
| Hypertension                                                                                            | Negative | 47<br>(100)   | 54<br>(88.52) | 0.018+              | -    | -           |
|                                                                                                         | Positive | 0<br>(0.00)   | 7<br>(11.48)  |                     |      |             |
| Symbology: *Median (p25–p75), <sup>o</sup> Mann-Whitney <i>U</i> , +Fisher’s exact, *Chi <sup>2</sup> . |          |               |               |                     |      |             |
